# Supplementary material for: Reconstructing hail days in Switzerland with statistical models (1959–2022)
Source: Copernicus journal article supplement (doi:10.5194/nhess-24-3869-2024), 2024-11-12
Supplement: Supplementary file 1 [file nhess-24-3869-2024-supplement.pdf]

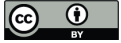

*Supplement of*

## **Reconstructing hail days in Switzerland with statistical models (1959–2022)**

**Lena Wilhelm et al.**

*Correspondence to:* Lena Wilhelm ([lena.wilhelm@unibe.ch](mailto:lena.wilhelm@unibe.ch))

The copyright of individual parts of the supplement might differ from the article licence.

**Table S1.** Summary of convective parameters and meteorological variables tested for model building: T and Td are temperature and dew point temperature,  $\theta_e$  is equivalent potential temperature, z is the geopotential height (gpdam). The subscript indicates a certain constant pressure level; an arrow indicates lifting of an air parcel (e.g.,  $T'_x \rightarrow y$  is the temperature T of a parcel at the y-level, which was initially lifted dry adiabatically from the x-level to its condensation level and moist adiabatically thereafter)

| Variable      | Explanation                                                                                                       | Unit               |
|---------------|-------------------------------------------------------------------------------------------------------------------|--------------------|
| BI            | Boyden Index = $0.1(z_{700} - z_{1000}) - T_{700} - 200$                                                          | Dimensionless      |
| BLH           | Boundary layer height                                                                                             | m                  |
| BRN           | Bulk Richardson Number = $\frac{CAPE}{0.5(WS_{062})}$                                                             | Dimensionless      |
| CAPE          | Most unstable convective available potential energy                                                               | J kg <sup>-1</sup> |
| CIN           | Convective inhibition                                                                                             | Jkg <sup>-1</sup>  |
| CT            | Cross Total = $Td_{850} - T_{500}$                                                                                | K                  |
| DCI           | Deep Convective Index = $T_{850} - Td_{850} - LI$                                                                 | K                  |
| EL_height     | Height of equilibrium level                                                                                       | km                 |
| EL_press      | Pressure of equilibrium level                                                                                     | hPa                |
| EL_temp       | Temperature of equilibrium level                                                                                  | °C                 |
| WSPD_250      | Windspeed at 250 hPa                                                                                              | ms <sup>-1</sup>   |
| WSPD_500      | Windspeed at 500 hPa                                                                                              | ms <sup>-1</sup>   |
| WSPD_700      | Windspeed at 700 hPa                                                                                              | ms <sup>-1</sup>   |
| WSPD_850      | Windspeed at 850 hPa                                                                                              | ms <sup>-1</sup>   |
| HI            | Humidity Index = $(T_{850} - Td_{850}) + (T_{700} - Td_{700}) + (T_{500} - Td_{500})$                             | K                  |
| KO            | KO Index = $0.5(\theta_{e500} + \theta_{e700}) - 0.5(\theta_{e850} + \theta_{e1000})$                             | K                  |
| KI            | K Index = $T_{850} + Td_{850} - T_{500} - (T_{700} - Td_{700})$                                                   | K                  |
| LCL_height    | Height of lifted condensation level                                                                               | km                 |
| LCL_press     | Pressure of lifted condensation level                                                                             | hPa                |
| LCL_temp      | Temperature of lifted condensation level                                                                          | K                  |
| LFC_height    | Height of level of free convection                                                                                | km                 |
| LFC_press     | Pressure of level of free convection                                                                              | hPa                |
| LFC_temp      | Temperature of level of free convection                                                                           | °C                 |
| MSLP          | Mean sea level pressure                                                                                           | Pa                 |
| omega_vint    | Vertically integrated vertical velocity (model levels 1–137)                                                      | Pas <sup>-1</sup>  |
| omega_vint_18 | Vertically integrated vertical velocity at 18 UTC (model levels 1–137)                                            | Pas <sup>-1</sup>  |
| pev           | Potential evaporation                                                                                             | m                  |
| PII           | Potential Instability Index = $\frac{\theta_{e925} - \theta_{e500}}{z_{500} - z_{950}}$                           | Dimensionless      |
| q_500         | Specific humidity at 500 hPa                                                                                      | kgkg <sup>-1</sup> |
| q_850         | Specific humidity at 850 hPa                                                                                      | kgkg <sup>-1</sup> |
| q_vint        | Vertically integrated specific humidity (model levels 1–137)                                                      | kgkg <sup>-1</sup> |
| q_vint_18     | Vertically integrated specific humidity at 18 UTC (model levels 1–137)                                            | kgkg <sup>-1</sup> |
| rh_850        | Relative Humidity at 850 hPa                                                                                      | %                  |
| rh_mid        | Mean of relative humidity at 500, 700, and 850 hPa                                                                | %                  |
| SHOW          | Showalter Index = $T_{500} - T'_{850 \rightarrow 500}$                                                            | K                  |
| LI            | Surface Based Lifted Index = $T_{500} - T'_{Surface \rightarrow 500}$                                             | K                  |
| SP            | Mean surface pressure                                                                                             | hPa                |
| SWISS00       | Stability and Wind Shear Index for thunderstorms in Switzerland = $SHOW + 0.4(WS_{36}) + 0.1(T_{600} - Td_{600})$ | Dimensionless      |
| SWISS12       | Stability and Wind Shear Index for thunderstorms in Switzerland = $LI - 0.1(WS_{03}) + 0.1(T_{650} - Td_{650})$   | Dimensionless      |
| SWP           | Severe Weather Parameter = $CAPE \cdot WS_{06}$                                                                   | Dimensionless      |

Continued on next page

| Variable       | Explanation                                                                | Unit              |
|----------------|----------------------------------------------------------------------------|-------------------|
| T_500          | Temperature at 500 hPa                                                     | K                 |
| T_700          | Temperature at 700 hPa                                                     | K                 |
| T_700_500      | Lapse rate between 700 and 500 hPa                                         | K                 |
| T_850          | Temperature at 850 hPa                                                     | K                 |
| T_850_700      | Lapse rate between 650 and 700 hPa                                         | K                 |
| T_2m           | Temperature at 2 meters                                                    | K                 |
| tcw            | Total column water from ERA5 single level                                  | kgm <sup>-2</sup> |
| Td_500         | Dewpoint temperature at 500 hPa                                            | K                 |
| Td_850         | Dewpoint temperature at 850 hPa                                            | K                 |
| Td_2m          | Temperature at 2 meters                                                    | K                 |
| thetae_2m      | Equivalent potential temperature at 2 meters                               | K                 |
| thetae_500     | Equivalent potential temperature at 500 hPa                                | K                 |
| thetae_500_850 | Difference between equivalent potential temperature at 850 hPa and 500 hPa | K                 |
| thetae_700     | Equivalent potential temperature at 700 hPa                                | K                 |
| thetae_850     | Equivalent potential temperature at 850 hPa                                | K                 |
| totalx         | Total Totals Index = $VT + CT$                                             | K                 |
| u_500          | Zonal wind component at 500 hPa                                            | ms <sup>-1</sup>  |
| u_850          | Zonal wind component at 850 hPa                                            | ms <sup>-1</sup>  |
| u_10           | Zonal wind component at 10 hPa                                             | ms <sup>-1</sup>  |
| u_100          | Zonal wind component at 100 hPa                                            | ms <sup>-1</sup>  |
| v_500          | Meridional wind component at 850 hPa                                       | ms <sup>-1</sup>  |
| v_850          | Meridional wind component at 850 hPa                                       | ms <sup>-1</sup>  |
| v_10           | Zonal wind component at 10 hPa                                             | ms <sup>-1</sup>  |
| v_100          | Meridional wind component at 100 hPa                                       | ms <sup>-1</sup>  |
| vor_500        | Vorticity (relative) at 500 hPa                                            | 1s <sup>-1</sup>  |
| VT             | Vertical Total = $T_{850} - T_{500}$                                       | K                 |
| w_500          | Vertical velocity at 500 hPa                                               | Pas <sup>-1</sup> |
| w_700          | Vertical velocity at 700 hPa                                               | Pas <sup>-1</sup> |
| WS_03          | Wind shear between 0 km and 3 km                                           | ms <sup>-1</sup>  |
| WS_06          | Wind shear between 0 km and 6 km                                           | ms <sup>-1</sup>  |
| WS_36          | Wind shear between 3 km and 6 km                                           | ms <sup>-1</sup>  |
| z_500          | Geopotential height at 500 hPa                                             | gpdam             |
| z_0°C          | Height of zero degree isotherm                                             | m                 |

*End of table*

**Table S2.** Mean values, 90<sup>th</sup> and 10<sup>th</sup> percentiles of tested model variables of region north and region south separately for the period 1959 to 2022. Mean is the 90<sup>th</sup> percentile mean.

| Variable      | Unit               | Mean North | 90 <sup>th</sup> North | 10 <sup>th</sup> North | Mean South | 90 <sup>th</sup> South | 10 <sup>th</sup> South |
|---------------|--------------------|------------|------------------------|------------------------|------------|------------------------|------------------------|
| BI            | Dimensionless      | 89.61      | 91.07                  | 87.80                  | 90.00      | 91.16                  | 88.62                  |
| BLH           | m                  | 1126.11    | 1463.56                | 760.87                 | 1133.79    | 1535.30                | 718.09                 |
| BRN           | Dimensionless      | 0.42       | 3.56                   | 0.00                   | 0.69       | 6.00                   | 0.00                   |
| CAPE          | Jkg <sup>-1</sup>  | 15.91      | 93.54                  | 0.11                   | 26.87      | 184.18                 | 0.15                   |
| CIN           | Jkg <sup>-1</sup>  | 117.67     | 464.81                 | 1.00                   | 135.36     | 425.25                 | 5.82                   |
| CT            | K                  | 20.09      | 23.48                  | 15.28                  | 19.73      | 23.13                  | 15.33                  |
| DCI           | K                  | 10.77      | 24.41                  | -5.61                  | 11.30      | 23.86                  | -4.47                  |
| EL_height     | km                 | 4.97       | 8.93                   | 2.18                   | 6.47       | 9.51                   | 3.38                   |
| EL_press      | hPa                | 556.32     | 777.36                 | 310.24                 | 452.66     | 667.73                 | 284.47                 |
| EL_temp       | °C                 | -15.90     | 0.08                   | -40.18                 | -24.20     | -3.98                  | -43.55                 |
| WSPD_250      | ms <sup>-1</sup>   | 21.11      | 37.53                  | 8.71                   | 20.33      | 36.78                  | 7.91                   |
| WSPD_500      | ms <sup>-1</sup>   | 12.56      | 22.59                  | 5.04                   | 11.42      | 21.01                  | 4.39                   |
| WSPD_700      | ms <sup>-1</sup>   | 7.61       | 13.60                  | 3.13                   | 5.26       | 9.70                   | 2.33                   |
| WSPD_850      | ms <sup>-1</sup>   | 4.98       | 8.93                   | 2.21                   | 1.92       | 3.83                   | 0.86                   |
| HI            | K                  | 26.36      | 45.83                  | 11.18                  | 47.50      | 66.37                  | 30.45                  |
| KO            | K                  | -0.14      | 5.99                   | -6.57                  | -0.48      | 4.86                   | -5.97                  |
| KI            | K                  | 14.48      | 25.42                  | -2.26                  | 16.09      | 24.10                  | 3.31                   |
| LCL_height    | km                 | 1.79       | 2.34                   | 1.33                   | 2.02       | 2.56                   | 1.54                   |
| LCL_press     | hPa                | 816.29     | 863.71                 | 762.02                 | 793.13     | 841.12                 | 741.10                 |
| LCL_temp      | K                  | 278.19     | 283.30                 | 271.50                 | 277.68     | 283.16                 | 269.93                 |
| LFC_height    | km                 | 2.39       | 4.01                   | 1.49                   | 2.89       | 4.30                   | 1.93                   |
| LFC_press     | hPa                | 758.74     | 846.97                 | 615.35                 | 712.69     | 801.57                 | 592.34                 |
| LFC_temp      | °C                 | 2.09       | 6.60                   | -4.99                  | 1.46       | 6.59                   | -6.80                  |
| Tmin_2m       | K                  | 289.53     | 296.23                 | 282.27                 | 289.26     | 295.37                 | 281.74                 |
| MSLP          | Pa                 | 1016.68    | 1022.49                | 1009.82                | 1015.77    | 1021.37                | 1009.04                |
| omega_vint    | Pas <sup>-1</sup>  | -84.87     | 609.52                 | -1128.85               | -165.39    | 735.05                 | -1358.83               |
| omega_vint_18 | Pas <sup>-1</sup>  | -206.32    | 614.20                 | -1406.01               | -55.74     | 811.37                 | -1244.75               |
| pev           | m                  | -0.00      | -0.00                  | -0.00                  | -0.00      | -0.00                  | -0.00                  |
| PII           | Dimensionless      | -0.00      | 0.02                   | -0.02                  | 0.00       | 0.00                   | -0.00                  |
| q_500         | kgkg <sup>-1</sup> | 0.90       | 1.65                   | 0.37                   | 0.93       | 1.68                   | 0.38                   |
| q_850         | kgkg <sup>-1</sup> | 6.40       | 8.83                   | 4.00                   | 6.72       | 9.29                   | 3.98                   |
| q_vint        | kgkg <sup>-1</sup> | 17.44      | 25.08                  | 10.10                  | 17.17      | 24.12                  | 9.80                   |
| q_vint_18     | kgkg <sup>-1</sup> | 18.16      | 26.15                  | 10.65                  | 17.87      | 24.99                  | 10.20                  |
| rh_850        | %                  | 71.46      | 87.20                  | 49.0                   | 63.54      | 80.40                  | 45.5                   |
| rh_mid        | %                  | 56.20      | 76.54                  | 35.97                  | 55.17      | 74.84                  | 38.84                  |
| SHOW          | K                  | 0.58       | 4.88                   | -3.30                  | 0.06       | 4.33                   | -3.49                  |
| LI            | K                  | 0.15       | 4.85                   | -3.85                  | -0.21      | 4.37                   | -3.92                  |
| SP            | Pa                 | 932.52     | 937.90                 | 925.57                 | 897.94     | 903.47                 | 890.87                 |
| SWISS00       | Dimensionless      | 7.22       | 12.77                  | 2.59                   | 8.16       | 13.29                  | 3.71                   |
| SWISS12       | Dimensionless      | 2.87       | 8.11                   | -1.38                  | 4.54       | 8.88                   | 0.56                   |
| SWP           | Dimensionless      | 173.59     | 1039.63                | 0.87                   | 268.29     | 1923.29                | 1.34                   |

*Continued on next page*

| Variable       | Unit               | Mean North | 90 <sup>th</sup> North | 10 <sup>th</sup> North | Mean South | 90 <sup>th</sup> South | 10 <sup>th</sup> South |
|----------------|--------------------|------------|------------------------|------------------------|------------|------------------------|------------------------|
| T_500          | K                  | 257.29     | 262.21                 | 250.21                 | 257.72     | 262.61                 | 250.70                 |
| T_700          | K                  | 273.15     | 278.60                 | 266.42                 | 273.86     | 279.04                 | 267.35                 |
| T_700_500      | K                  | 16.02      | 18.00                  | 13.82                  | 16.31      | 18.17                  | 14.30                  |
| T_850          | K                  | 282.58     | 289.03                 | 275.48                 | 284.61     | 289.93                 | 277.80                 |
| T_850_700      | K                  | 9.65       | 11.60                  | 7.32                   | 10.85      | 12.33                  | 9.08                   |
| T_2m           | K                  | 290.58     | 297.51                 | 282.98                 | 290.21     | 296.27                 | 282.46                 |
| tcw            | kgm <sup>-12</sup> | 17.58      | 25.29                  | 10.22                  | 17.28      | 24.24                  | 9.90                   |
| Td_500         | K                  | 245.07     | 253.18                 | 235.95                 | 245.52     | 253.33                 | 236.48                 |
| Td_850         | K                  | 277.00     | 282.07                 | 270.35                 | 277.27     | 282.59                 | 270.04                 |
| Td_2m          | K                  | 282.67     | 287.62                 | 276.06                 | 281.93     | 286.99                 | 274.79                 |
| thetae_2m      | K                  | 320.92     | 336.23                 | 304.66                 | 324.27     | 339.02                 | 307.27                 |
| thetae_500     | K                  | 316.85     | 324.03                 | 306.88                 | 317.42     | 324.50                 | 307.48                 |
| thetae_500_850 | K                  | 2.30       | 9.78                   | -5.24                  | 0.24       | 7.16                   | -6.76                  |
| thetae_700     | K                  | 312.03     | 321.56                 | 300.80                 | 314.74     | 324.10                 | 302.90                 |
| thetae_850     | K                  | 314.32     | 327.28                 | 300.38                 | 316.99     | 329.58                 | 302.67                 |
| totalx         | K                  | 42.41      | 47.96                  | 34.03                  | 43.37      | 47.78                  | 37.07                  |
| u_500          | ms <sup>-1</sup>   | 7.33       | 18.81                  | -3.58                  | 6.82       | 17.50                  | -3.55                  |
| u_850          | ms <sup>-1</sup>   | 1.53       | 6.40                   | -2.80                  | 0.14       | 1.42                   | -1.46                  |
| u_10           | ms <sup>-1</sup>   | 0.73       | 2.71                   | -1.25                  | -0.03      | 0.74                   | -0.82                  |
| u_100          | ms <sup>-1</sup>   | 1.01       | 3.89                   | -1.76                  | 0.00       | 1.05                   | -1.11                  |
| v_500          | ms <sup>-1</sup>   | 0.30       | 11.44                  | -10.98                 | -0.31      | 10.22                  | -10.56                 |
| v_850          | ms <sup>-1</sup>   | 0.14       | 4.30                   | -3.73                  | 0.76       | 2.71                   | -1.45                  |
| v_10           | ms <sup>-1</sup>   | -0.36      | 1.60                   | -2.34                  | 0.61       | 1.39                   | -0.52                  |
| v_100          | ms <sup>-1</sup>   | -0.46      | 2.31                   | -3.23                  | 0.80       | 1.94                   | -0.83                  |
| vor_500        | ls <sup>-1</sup>   | -0.00      | 0.00                   | -0.00                  | 0.00       | 0.00                   | -0.00                  |
| VT             | K                  | 25.59      | 29.06                  | 21.85                  | 27.09      | 29.73                  | 24.26                  |
| w_500          | Pas <sup>-1</sup>  | -0.02      | 0.12                   | -0.22                  | -0.01      | 0.15                   | -0.24                  |
| w_700          | Pas <sup>-1</sup>  | -0.01      | 0.13                   | -0.21                  | -0.04      | 0.16                   | -0.31                  |
| WS_03          | ms <sup>-1</sup>   | 5.92       | 11.39                  | 2.02                   | 4.76       | 8.64                   | 1.95                   |
| WS_06          | ms <sup>-1</sup>   | 11.09      | 20.73                  | 3.85                   | 11.21      | 20.72                  | 3.99                   |
| WS_36          | ms <sup>-1</sup>   | 6.11       | 11.66                  | 2.14                   | 7.09       | 13.63                  | 2.41                   |
| z_500          | gpdam              | 559.54     | 571.90                 | 543.02                 | 560.48     | 572.61                 | 544.09                 |
| z_0°C          | m                  | 2433.65    | 3426.54                | 1137.65                | 2256.94    | 3161.47                | 1133.94                |

*End of table*

**Table S3.** Correlation of all variables to the hail-day time series of both regions. The correlation was only calculated for the period where we have information on hail days, so for years 2002–2022.  $r$  is the Pearson correlation and  $p$ -value is the respective  $p$ -value, whereby zero means an extremely small number (smaller than can be calculated by R’s package Hmisc::rcorr).

| Variable      | r North | p-value North          | r South | p-value South          |
|---------------|---------|------------------------|---------|------------------------|
| BI            | 0.03    | 0.05                   | -0.00   | 0.87                   |
| BLH           | 0.06    | 0.00                   | -0.04   | 0.01                   |
| BRN           | 0.08    | $2.24 \times 10^{-6}$  | 0.11    | $3.16 \times 10^{-12}$ |
| CAPE          | 0.49    | 0.00                   | 0.45    | 0.00                   |
| CIN           | 0.40    | 0.00                   | 0.06    | 0.01                   |
| CT            | 0.22    | 0.00                   | 0.29    | 0.00                   |
| DCI           | 0.44    | 0.00                   | 0.36    | 0.00                   |
| EL_height     | 0.56    | 0.00                   | 0.39    | 0.00                   |
| EL_press      | -0.53   | 0.00                   | -0.38   | 0.00                   |
| EL_temp       | -0.56   | 0.00                   | -0.39   | 0.00                   |
| WSPD_250      | -0.13   | $2.22 \times 10^{-16}$ | -0.06   | 0.00                   |
| WSPD_500      | -0.09   | $6.98 \times 10^{-8}$  | -0.00   | 0.86                   |
| WSPD_700      | 0.01    | 0.60                   | 0.03    | 0.04                   |
| WSPD_850      | -0.07   | $1.08 \times 10^{-5}$  | -0.07   | $5.97 \times 10^{-6}$  |
| HI            | -0.07   | $4.65 \times 10^{-5}$  | -0.06   | $9.42 \times 10^{-5}$  |
| KO            | -0.49   | 0.00                   | -0.42   | 0.00                   |
| KI            | 0.39    | 0.00                   | 0.33    | 0.00                   |
| LCL_height    | 0.12    | $1.31 \times 10^{-13}$ | -0.11   | $1.35 \times 10^{-11}$ |
| LCL_press     | -0.12   | $4.48 \times 10^{-13}$ | 0.10    | $3.35 \times 10^{-10}$ |
| LCL_temp      | 0.34    | 0.00                   | 0.33    | 0.00                   |
| LFC_height    | 0.18    | 0.00                   | -0.02   | 0.35                   |
| LFC_press     | -0.20   | 0.00                   | 0.00    | 0.86                   |
| LFC_temp      | 0.15    | 0.00                   | 0.23    | 0.00                   |
| Tmin_2m       | 0.40    | 0.00                   | 0.26    | 0.00                   |
| MSLP          | -0.13   | $4.44 \times 10^{-16}$ | -0.09   | $2.06 \times 10^{-8}$  |
| omega_vint    | -0.19   | 0.00                   | -0.26   | 0.00                   |
| omega_vint_18 | -0.31   | 0.00                   | -0.26   | 0.00                   |
| pev           | -0.29   | 0.00                   | -0.10   | $1.36 \times 10^{-9}$  |
| PII           | 0.52    | 0.00                   | -0.42   | 0.00                   |
| q_500         | 0.26    | 0.00                   | 0.20    | 0.00                   |
| q_850         | 0.42    | 0.00                   | 0.33    | 0.00                   |
| q_vint_12     | 0.40    | 0.00                   | 0.33    | 0.00                   |
| q_vint_18     | 0.44    | 0.00                   | 0.32    | 0.00                   |
| rh_850        | -0.06   | 0.00                   | 0.03    | 0.07                   |
| rh_mid        | 0.01    | 0.70                   | 0.03    | 0.06                   |
| SHOW          | -0.46   | 0.00                   | -0.40   | 0.00                   |
| LI            | -0.47   | 0.00                   | -0.41   | 0.00                   |
| SP            | -0.06   | 0.00                   | -0.02   | 0.14                   |
| SWISS00       | -0.38   | 0.00                   | -0.27   | 0.00                   |
| SWISS12       | -0.37   | 0.00                   | -0.30   | 0.00                   |
| SWP           | 0.43    | 0.00                   | 0.41    | 0.00                   |

*Continued on next page*

| <b>Variable</b> | <b>r North</b> | <b>p-value North</b>   | <b>r South</b> | <b>p-value South</b>   |
|-----------------|----------------|------------------------|----------------|------------------------|
| T_500           | 0.20           | 0.00                   | 0.17           | 0.00                   |
| T_700           | 0.31           | 0.00                   | 0.26           | 0.00                   |
| T_700_500       | 0.30           | 0.00                   | 0.25           | 0.00                   |
| T_850           | 0.41           | 0.00                   | 0.28           | 0.00                   |
| T_850_700       | 0.39           | 0.00                   | 0.11           | $7.93 \times 10^{-12}$ |
| T_2m            | 0.38           | 0.00                   | 0.25           | 0.00                   |
| tcw             | 0.39           | 0.00                   | 0.33           | 0.00                   |
| Td_500          | 0.22           | 0.00                   | 0.19           | 0.00                   |
| Td_850          | 0.36           | 0.00                   | 0.33           | 0.00                   |
| Td_2m           | 0.39           | 0.00                   | 0.34           | 0.00                   |
| thetae_2m       | 0.45           | 0.00                   | 0.35           | 0.00                   |
| thetae_500      | 0.23           | 0.00                   | 0.19           | 0.00                   |
| thetae_500_850  | -0.51          | 0.00                   | -0.42          | 0.00                   |
| thetae_700      | 0.39           | 0.00                   | 0.30           | 0.00                   |
| thetae_850      | 0.44           | 0.00                   | 0.35           | 0.00                   |
| totalx          | 0.35           | 0.00                   | 0.30           | 0.00                   |
| u_500           | 0.04           | 0.01                   | 0.12           | $1.78 \times 10^{-14}$ |
| u_850           | 0.01           | 0.47                   | 0.08           | $1.33 \times 10^{-7}$  |
| u_10            | -0.02          | 0.34                   | 0.05           | 0.00                   |
| u_100           | -0.02          | 0.28                   | 0.05           | 0.00                   |
| v_500           | 0.29           | 0.00                   | 0.22           | 0.00                   |
| v_850           | 0.23           | 0.00                   | 0.16           | 0.00                   |
| v_10            | 0.17           | 0.00                   | 0.10           | $3.40 \times 10^{-10}$ |
| v_100           | 0.17           | 0.00                   | 0.10           | $2.10 \times 10^{-10}$ |
| vor_500         | -0.13          | $2.00 \times 10^{-15}$ | 0.04           | 0.01                   |
| VT              | 0.42           | 0.00                   | 0.24           | 0.00                   |
| w_500           | -0.16          | 0.00                   | -0.20          | 0.00                   |
| w_700           | -0.13          | $1.33 \times 10^{-15}$ | -0.21          | 0.00                   |
| WS_03           | 0.14           | 0.00                   | 0.07           | $3.41 \times 10^{-5}$  |
| WS_06           | 0.00           | 0.76                   | 0.01           | 0.55                   |
| WS_36           | -0.15          | 0.00                   | -0.04          | 0.02                   |
| z_500           | 0.19           | 0.00                   | 0.14           | 0.00                   |
| z_0°C           | 0.28           | 0.00                   | 0.23           | 0.00                   |

*End of table*

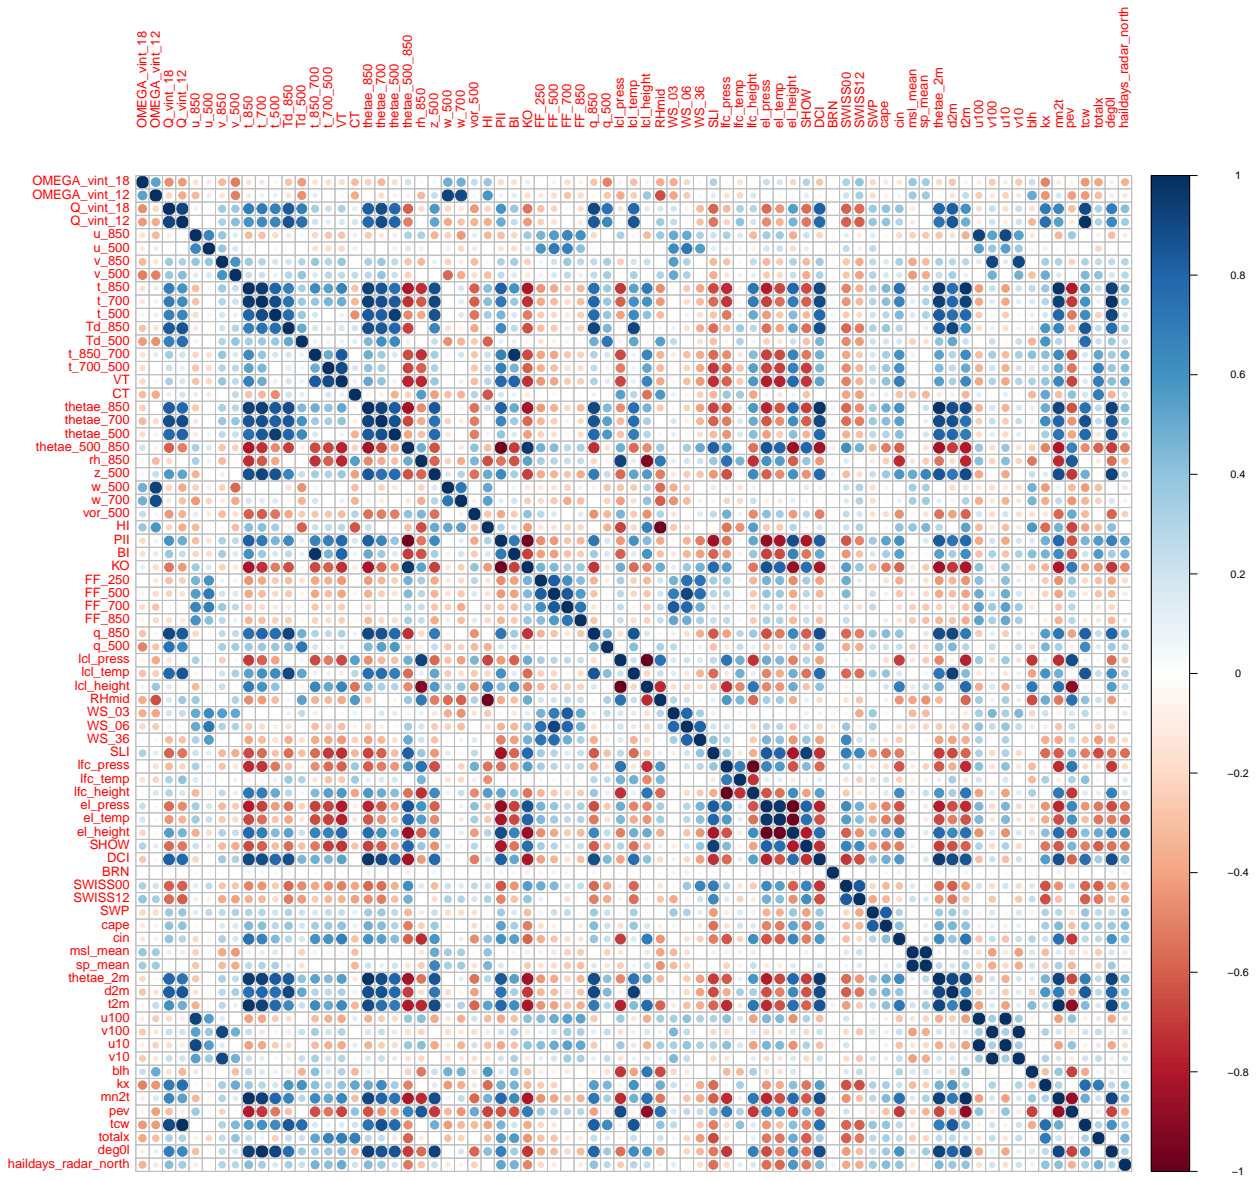

**Figure S1.** Correlation matrix of all tested model variables and the hail-day time series for region north (period 2002–2022).



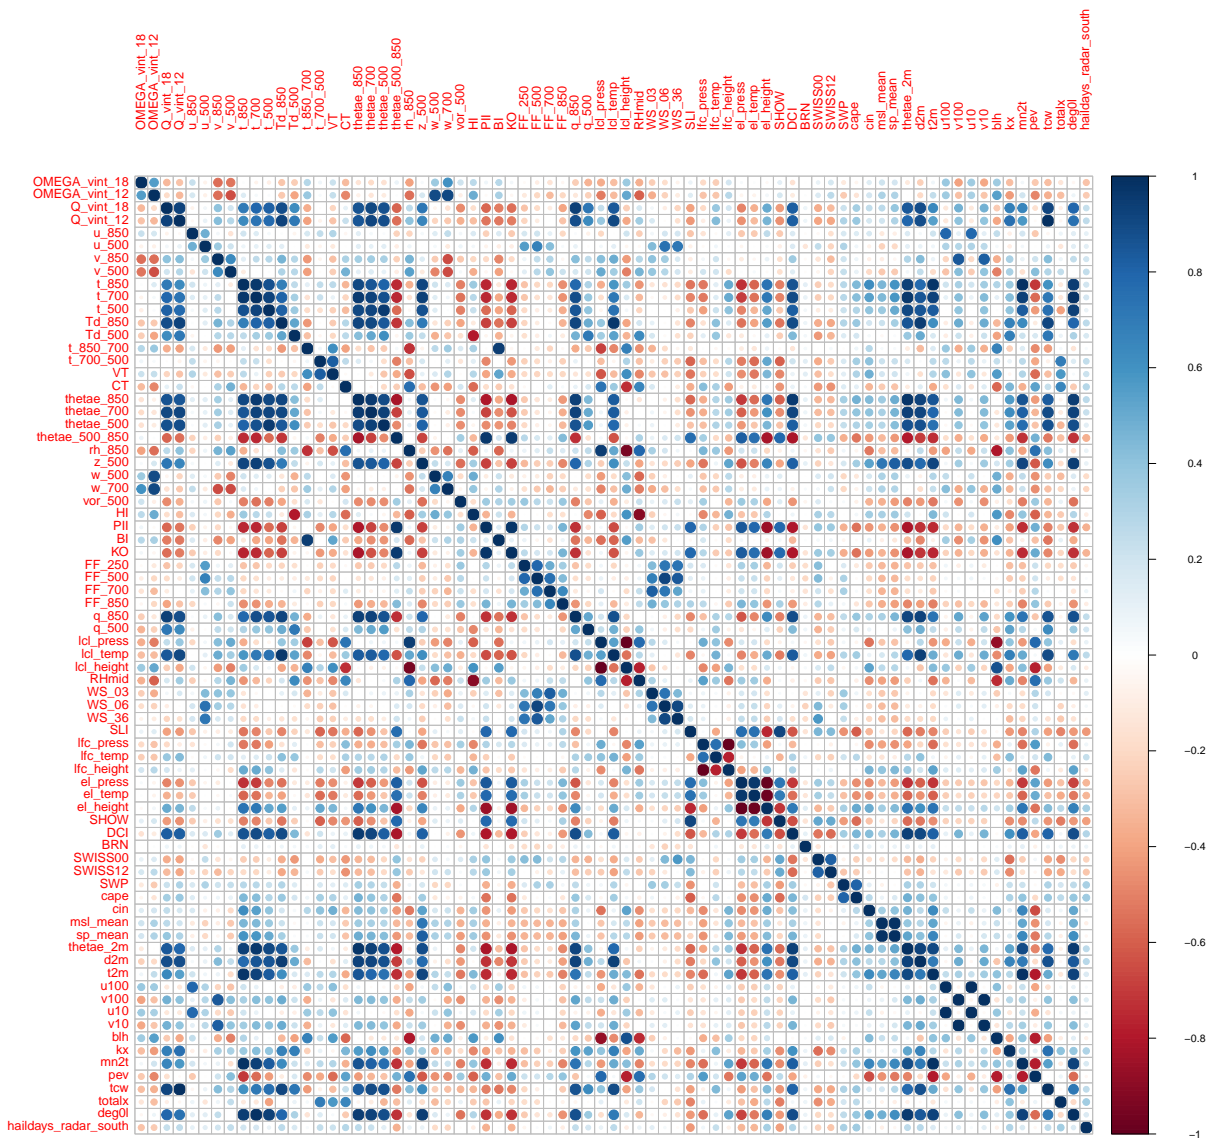

**Figure S2.** Correlation matrix of all tested model variables and the hail-day time series for region south (period 2002–2022).
